# Supplementary material for: Is Smaller Thyroid Gland Volume in COVID-19 Survivors Indicative of Chronic Thyroid Dysfunction?
Source: Research Square preprint supplement (doi:10.21203/rs.3.rs-971654/v1), 2021-10-20
Supplement: Supplementary file 1 [file 33a9e694e3875d9fc8a936d4.docx]

**Table 3.** Subgroup analysis of thyroid volume in COVID-19 survivors

ICU: intensive care unit

| THYROID VOLUME (ml) OF COVID-19 SURVIVORS (N=64) P VALUE |
| --- |
| Gender Male(N=32) Female(N=32)  11.09±3.09 9.57±3.58 0.07 |
| Anti-TPO (+)(N=5) (-)(N=59)  0-34 U/ml 8.31±4.94 10.50±3.25 0.17 |
| Anti-Tg (+)(N=4) (-)(N=60)  0-115 U/ml 10.49±3.44 7.87±1.48 0.13 |
| Lymphopenia (+)(N=36) (-)(N=28)  9.94±3.25 10.83±3.60 0.30 |
| ICU history (+)(N=5) (-)(N=59)  10.48±4.1 10.32±3.38 0.91 |
| Intubation history (+)(N=2) (-)(N=62)  13.66±0.56 10.22±3.41 0.16 |
| Oxygen demand (+)(N=22) (-)(N=42)  10.27±3.58 10.36±3.30 0.91 |
| Steroid therapy history (+)(N=7) (-)(N=57)  10.45±3.50 10.31±3.42 0.92 |
